# Supplementary material for: The fiber diameter traits of Tibetan cashmere goats are governed by the inherent differences in stress, hypoxic, and metabolic adaptations: an integrative study of proteome and transcriptome
Source: PubMed Central journal article supplement (PMC8903710; doi:10.1186/s12864-022-08422-x), 2022-03-07
Supplement: 12864_2022_8422_MOESM4_ESM.pdf [file 12864_2022_8422_MOESM4_ESM.pdf]

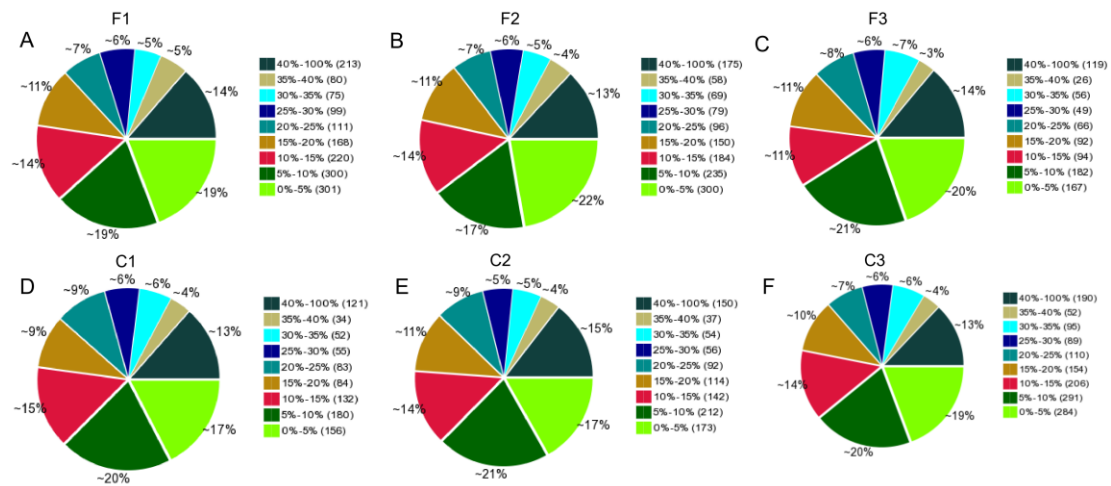

**Additional file 4: Figure S2. The distribution of protein's sequence coverage.**

Different colours represent different ranges of sequences coverage. The percentage shows the proportion of the number of proteins with different coverage ranges/the total number of proteins. The plots A, B, C, D, E, and F corresponds to F1, F2, F3, C1, C2, and C3 (F, fine; C, coarse) samples, respectively.
