# Supplementary material for: The fiber diameter traits of Tibetan cashmere goats are governed by the inherent differences in stress, hypoxic, and metabolic adaptations: an integrative study of proteome and transcriptome
Source: PubMed Central journal article supplement (PMC8903710; doi:10.1186/s12864-022-08422-x), 2022-03-07
Supplement: 12864_2022_8422_MOESM5_ESM.pdf [file 12864_2022_8422_MOESM5_ESM.pdf]

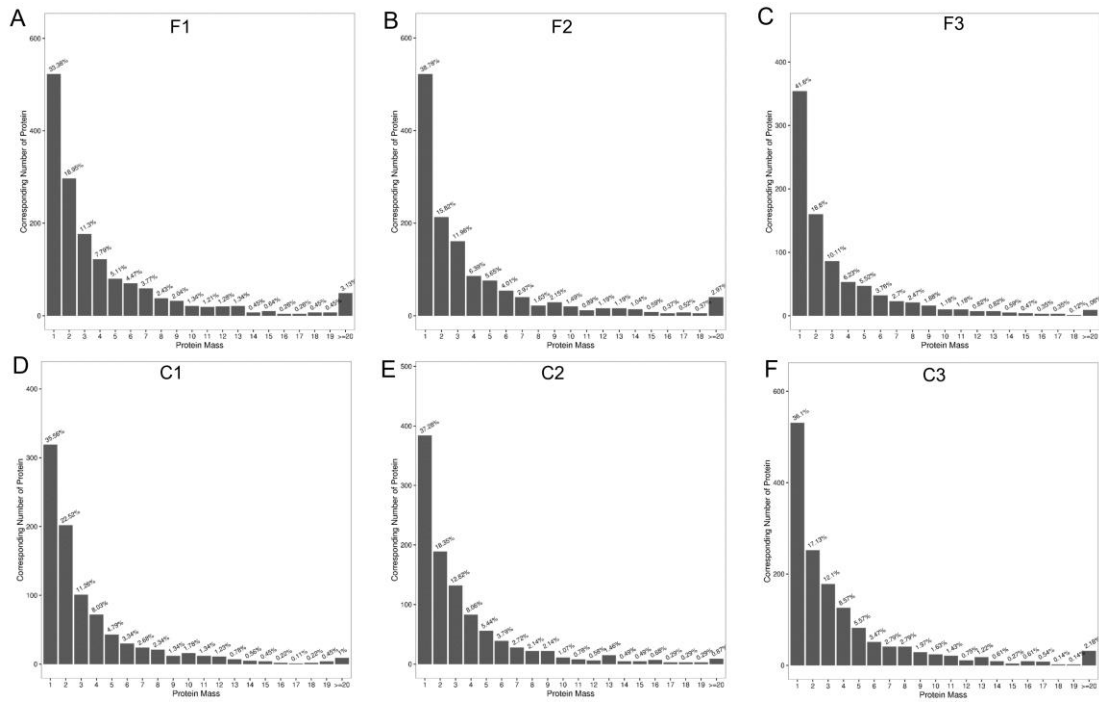

**Additional file 5: Figure S3. The number of peptide fragments for protein identification.** The x-axis show number of peptides, and the y-axis is the number of proteins with the number of peptide. The plots A, B, C, D, E, and F represents F1, F2, F3, C1, C2, and C3 (F, fine; C, coarse) samples, respectively.
