# Supplementary material for: The fiber diameter traits of Tibetan cashmere goats are governed by the inherent differences in stress, hypoxic, and metabolic adaptations: an integrative study of proteome and transcriptome
Source: PubMed Central journal article supplement (PMC8903710; doi:10.1186/s12864-022-08422-x), 2022-03-07
Supplement: 12864_2022_8422_MOESM7_ESM.pdf [file 12864_2022_8422_MOESM7_ESM.pdf]

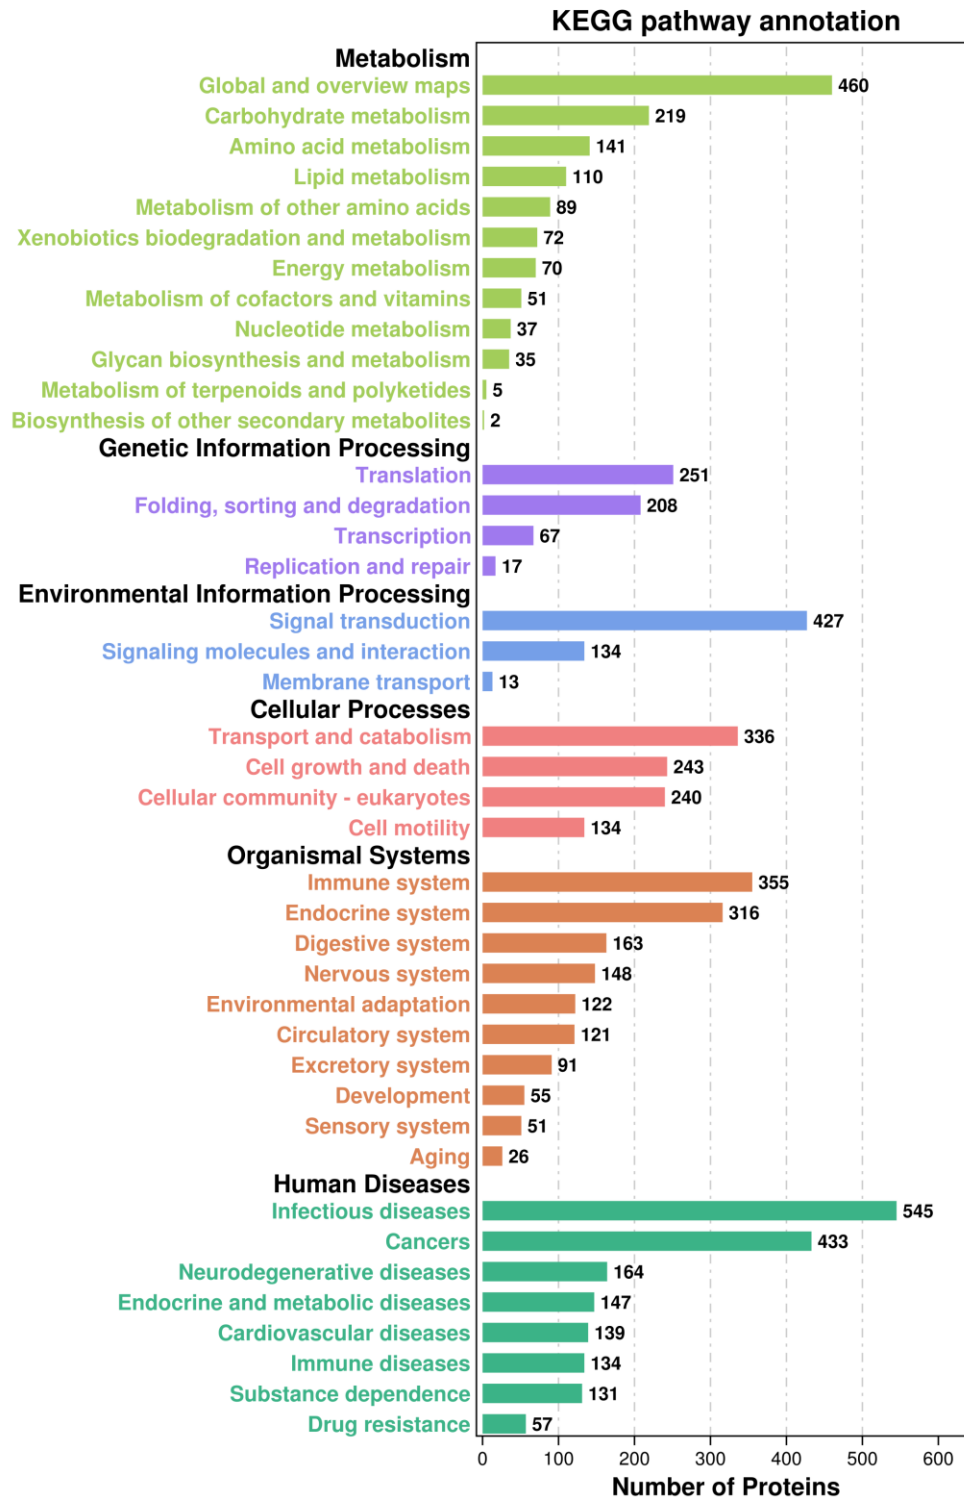

Additional file 7: Figure S5. The KEGG annotation of all expressed proteins.
