# Supplementary material for: The fiber diameter traits of Tibetan cashmere goats are governed by the inherent differences in stress, hypoxic, and metabolic adaptations: an integrative study of proteome and transcriptome
Source: PubMed Central journal article supplement (PMC8903710; doi:10.1186/s12864-022-08422-x), 2022-03-07
Supplement: 12864_2022_8422_MOESM8_ESM.pdf [file 12864_2022_8422_MOESM8_ESM.pdf]

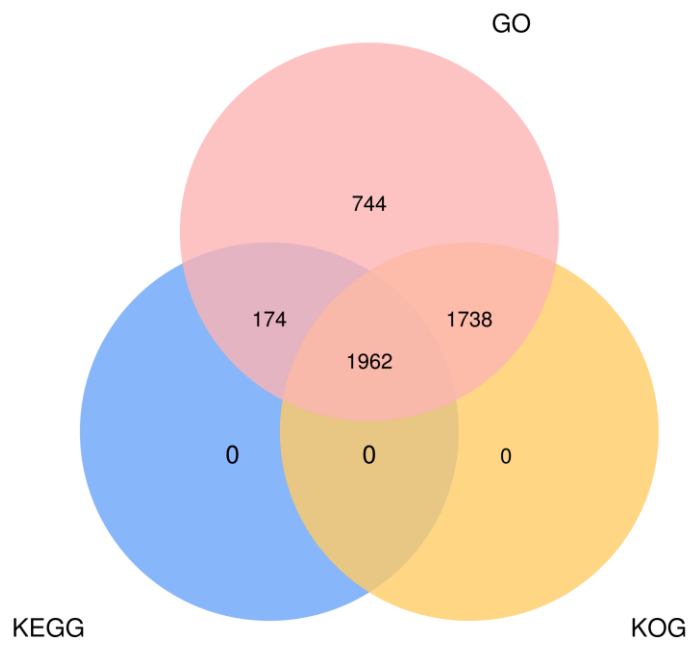

**Additional file 8: Figure S6. Venn plot indicated the overlapped annotated proteins of GO, KEGG, and KOG database.**
