# Supplementary material for: The fiber diameter traits of Tibetan cashmere goats are governed by the inherent differences in stress, hypoxic, and metabolic adaptations: an integrative study of proteome and transcriptome
Source: PubMed Central journal article supplement (PMC8903710; doi:10.1186/s12864-022-08422-x), 2022-03-07
Supplement: 12864_2022_8422_MOESM10_ESM.pdf [file 12864_2022_8422_MOESM10_ESM.pdf]

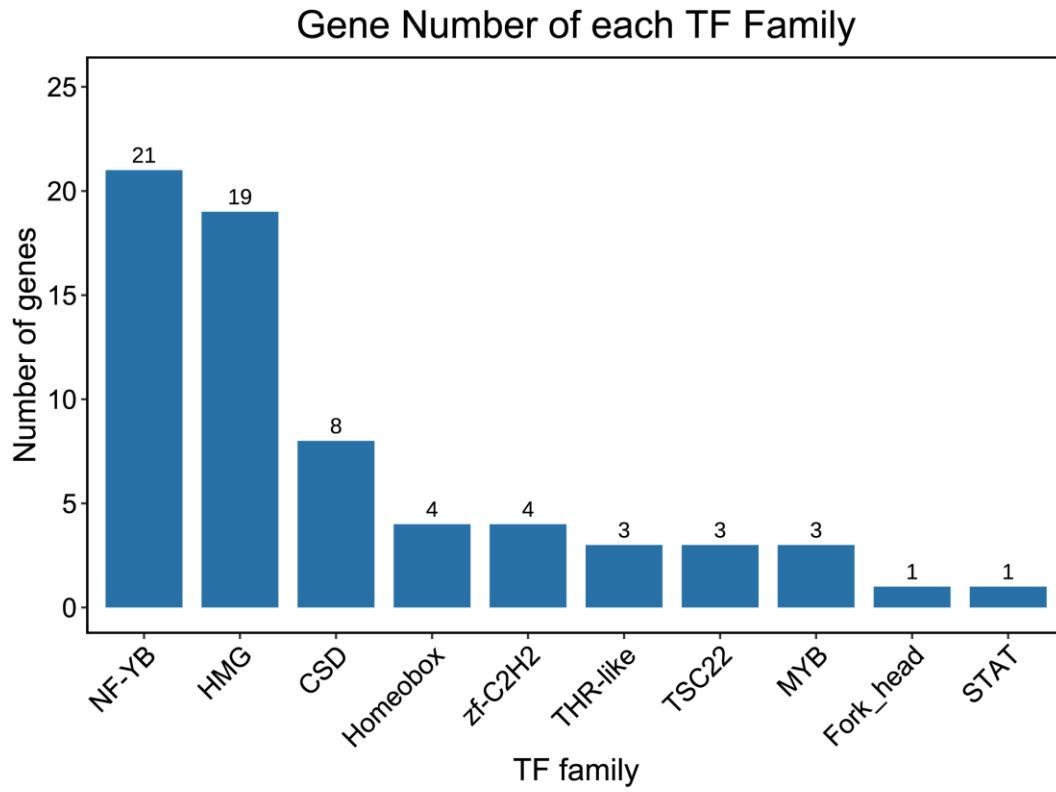

**Additional file 10: Figure S7. The top 10 TF families detected in all expressed proteins.**
